1 **Hydrogen production by *Sulfurospirillum* spp. enables syntrophic interactions**  
2 **of Epsilonproteobacteria**

3

4 **Stefan Kruse<sup>1,§</sup>, Tobias Goris<sup>1,§,#</sup>, Martin Westermann<sup>2</sup>, Lorenz Adrian<sup>3,4</sup>, Gabriele Diekert<sup>1</sup>**

5

6 <sup>1</sup>Department of Applied and Ecological Microbiology, Institute of Microbiology, Friedrich Schiller  
7 University, Philosophenweg 12, 07743 Jena, Germany

8 <sup>2</sup>Center for Electron Microscopy of the University Hospital Jena, Ziegelmühlenweg 1, 07743 Jena,  
9 Germany

10 <sup>3</sup>Department Isotope Biogeochemistry, Helmholtz Centre for Environmental Research – UFZ,  
11 Permoserstr. 15, 04318 Leipzig, Germany

12 <sup>4</sup>Technische Universität Berlin, Fachgebiet Geobiotechnologie, Ackerstraße 76, 13355 Berlin

13

14 §: These authors contributed equally to this work

15 #: Corresponding author

16

## 17 **Abstract**

18 Hydrogen-producing bacteria are of environmental and biotechnological importance in anoxic  
19 environments, since hydrogen is an important electron donor for prokaryotes and of interest as an  
20 alternative energy source. Epsilonproteobacteria, inhabiting ecologically, clinically or biotechnologically  
21 relevant environments, are currently considered to be hydrogen-oxidizing bacteria exclusively. Here,  
22 we report hydrogen production for a genus of free-living Epsilonproteobacteria, *Sulfurospirillum* spp.  
23 inhabiting sediments, wastewater plants, bioelectrodes, oil reservoirs, contaminated areas, or marine  
24 habitats. The amount of hydrogen production was largely different in two subgroups of *Sulfurospirillum*  
25 spp., represented by *S. cavolei* and *S. multivorans*. The former is shown to be the more potent  
26 hydrogen producer and excretes acetate as sole organic acid, while the latter exhibited a more flexible  
27 fermentation, producing additionally lactate and succinate. The observed hydrogen production could  
28 be assigned to a group 4 hydrogenase similar to Hydrogenase 4 (Hyf) in *E. coli*. We propose that  
29 *Sulfurospirillum* spp. produce molecular hydrogen with electrons derived from pyruvate oxidation by  
30 pyruvate:ferredoxin oxidoreductase and reduced ferredoxin. This hypothesis is supported by  
31 comparative proteome data, in which both PFOR and ferredoxin as well as hydrogenase 4 are  
32 up-regulated. A co-culture experiment with *S. multivorans* and *Methanococcus voltae* cultivated with  
33 lactate as sole substrate shows a syntrophic interaction between both organisms, since the former  
34 cannot grow fermentatively on lactate alone and the latter relies on hydrogen as electron donor. This  
35 opens up new perspectives on microbial communities, since Epsilonproteobacteria could play a yet  
36 unrecognized role as hydrogen producers in anoxic microbial communities.

37

38

## 39 Introduction

40 Hydrogen gas (H<sub>2</sub>), an important energy substrate for many bacteria and archaea, plays a crucial role  
41 in the anaerobic food web, e.g. in syntrophic interactions. It is produced by fermenting bacteria as a  
42 result of the disposal of excess reducing equivalents. Other prokaryotes may use it as an electron  
43 donor for e.g. sulfate respiration or methanogenesis. In syntrophic interactions, the H<sub>2</sub>-producing  
44 bacterium is dependent on the H<sub>2</sub> uptake of its syntrophic partner, which sustains a low H<sub>2</sub> partial  
45 pressure and thus enables H<sub>2</sub> production, which would otherwise thermodynamically be  
46 unfavorable<sup>1-3</sup>. For example, butyrate, propionate or acetate-oxidizing anaerobic bacteria that form H<sub>2</sub>  
47 as fermentation product are dependent on H<sub>2</sub>-oxidizing microorganisms such as methanogenic  
48 archaea<sup>4-6</sup>. It was shown that the interspecies H<sub>2</sub> transfer becomes more efficient when syntrophs and  
49 methanogens are in close physical contact<sup>7,8</sup>. The syntrophic degradation of propionate by a  
50 co-culture of *Pelotomaculum thermopropionicum* and *Methanothermobacter thermoautotrophicus* as  
51 well as ethanol degradation by *Geobacter sulfurreducens* and *Geobacter metallireducens* resulted in  
52 aggregate formation and cell-to-cell contact of the involved organisms<sup>9,10</sup>. In addition to the importance  
53 of H<sub>2</sub> in microbial food webs, H<sub>2</sub> is considered to be an alternative energy source and biohydrogen  
54 production by microorganisms is discussed as one way to generate environmentally compatible  
55 fuels<sup>11</sup>.

56 Epsilonproteobacteria are hitherto considered to be H<sub>2</sub>-consuming organisms exclusively and  
57 H<sub>2</sub>-oxidizing enzymes of only a few Epsilonproteobacteria are characterized so far, e.g. the  
58 membrane-bound uptake hydrogenases of *Helicobacter pylori* and *Wolinella succinogenes*<sup>12,13</sup>. H<sub>2</sub>  
59 production has never been shown to be performed by any Epsilonproteobacterium so far, although in  
60 recent years several Epsilonproteobacteria, especially marine, deep vent-inhabiting species, were  
61 reported to encode putative H<sub>2</sub>-evolving hydrogenases in their genomes<sup>14-22</sup>. *Sulfurospirillum* spp. are  
62 free-living, metabolically versatile Epsilonproteobacteria, many of which are known for their ability to  
63 respire toxic or environmentally harmful compounds such as arsenate, selenate or organohalides (e.g.  
64 tetrachloroethene - PCE)<sup>23,24</sup>. The anaerobic respiration with PCE, leading to the formation of  
65 *cis*-1,2-dichloroethene (cDCE), was studied in detail in *S. multivorans* (formerly known as  
66 *Dehalospirillum multivorans*)<sup>26,27</sup>. Several *Sulfurospirillum* spp. were found in contaminated sediments,  
67 wastewater plants, marine environments or biocathodes<sup>19,23,27,28</sup>. The role of *Sulfurospirillum* in such  
68 environments is unclear.

69 In previous studies, four gene clusters, each encoding a [NiFe] hydrogenase, were found in the  
70 genome of *S. multivorans*<sup>20</sup> and most other *Sulfurospirillum* spp.<sup>23</sup>. Two of these appear to be  
71 H<sub>2</sub>-producing, the other two are potential H<sub>2</sub>-uptake enzymes as deduced from sequence similarity to  
72 known hydrogenases. Of these four hydrogenases, one of each type, H<sub>2</sub>-oxidizing and H<sub>2</sub>-producing,  
73 were previously detected in *S. multivorans*<sup>26,29</sup>. The periplasmically oriented H<sub>2</sub>-oxidizing enzyme is  
74 very similar to the characterized *W. succinogenes* and *H. pylori* membrane-bound hydrogenase  
75 (MBH). It comprises three subunits, the large subunit, harboring the NiFe active site, a small subunit  
76 for electron transfer with three FeS clusters, and a membrane-integral cytochrome *b*. The putative  
77 H<sub>2</sub>-producing, cytoplasmically oriented enzyme (Hyf) is a large, complex enzyme with eight subunits,  
78 four of them membrane-integral. Regarding amino acid sequence and subunit architecture, this  
79 hydrogenase is similar to hydrogenase 4 of *E. coli*, part of a putative second formate hydrogen lyase  
80 (FHL). However, in *S. multivorans*, Hyf is unlikely to form an FHL complex since the corresponding  
81 gene cluster does not encode any formate-specific proteins as is the case for the FHL complexes in  
82 *E. coli* (Supplementary Figure 1).

83 Here, we show that several *Sulfurospirillum* spp. produce H<sub>2</sub> upon pyruvate fermentation. *S. cavolei*  
84 was observed to produce more H<sub>2</sub> than other *Sulfurospirillum* spp., which is caused by a different  
85 fermentation metabolism. To unravel the metabolism and the hydrogenase equipment of both  
86 organisms, label-free comparative proteomics was carried out. A co-culture experiment of *S.*  
87 *multivorans* with the methanogenic archaeon *Methanococcus voltae* revealed an interspecies H<sub>2</sub>  
88 transfer between both organisms suggesting a hitherto undiscovered contribution of *Sulfurospirillum*  
89 spp. and other Epsilonproteobacteria to the microbial anaerobic food web as a H<sub>2</sub> producer.

90

## 91 **Experimental Procedures**

### 92 **Cultivation of bacteria**

93 *S. multivorans* (DSMZ 12446) was cultivated under anaerobic conditions at 28°C in a defined mineral  
94 medium<sup>30</sup> without vitamin B<sub>12</sub> (cyanocobalamin). Pyruvate (40 mM) was used as electron donor and  
95 fumarate (40 mM) as electron acceptor. For fermentation experiments, all cultivations were performed  
96 with pyruvate (40 mM) or lactate (40 mM) as sole energy source in the absence of an electron  
97 acceptor and without yeast extract. Bacteria were grown in serum bottles with a ratio of aqueous to

98 gas phase of 1:1. If not stated otherwise, the gas phase was N<sub>2</sub> (150 kPa). For the cultivation with  
99 100% H<sub>2</sub> in the gas phase, nitrogen was completely removed after autoclaving by flushing with H<sub>2</sub> and  
100 an overpressure of 50 kPa was applied. Fermentation balance experiments were performed at 28°C in  
101 1 L Schott bottles placed in a Fermentation apparatus to allow for the expansion of the gases during  
102 the cultivation and to determine the stoichiometry of dissolved and gaseous fermentation products  
103 (Supplementary Figure 2). For CO<sub>2</sub> quantification, the gas phase of the Schott bottle was connected  
104 via a tube to a washing flask filled with 200 mL 4 M KOH to bind produced CO<sub>2</sub> as carbonate.  
105 Downstream, the gas phase of the washing flask was further connected to a water-filled measuring  
106 cylinder placed up-side down in a water bath. The amount of H<sub>2</sub> was determined volumetrically via the  
107 displaced volume of water in the measuring cylinder that correlates with the amount of H<sub>2</sub> produced.  
108 The concentration was calculated using the ideal gas equation. The adaptation experiment included a  
109 transfer in the next sub-cultivation step every 48 h with 10% inoculum. *Clostridium pasteurianum* W5  
110 was cultivated in anoxic media composed of 1L basal medium (autoclaved) supplemented with the  
111 following anoxic solutions: 100 mL phosphate buffer (142 g L<sup>-1</sup> K<sub>2</sub>HPO<sub>4</sub>, 15 g L<sup>-1</sup> KH<sub>2</sub>PO<sub>4</sub>) and 5 mL  
112 iron solution (10 g L<sup>-1</sup> FeSO<sub>4</sub> · 7 H<sub>2</sub>O). The basal medium contained per L 142 mg NaCl, 1.42 g NH<sub>4</sub>Cl,  
113 284 mg MgSO<sub>4</sub> · 7 H<sub>2</sub>O, 14.2 mg Na<sub>2</sub>MoO<sub>4</sub> · 2 H<sub>2</sub>O, 28.4 mg D(+) biotin and 1.42 mg  
114 4-aminobenzoate. Cells were grown in rubber-stoppered serum bottles with a ratio of aqueous to gas  
115 phase of 1:4. Pyruvate (40 mM) and Glucose (20 mM) were used as substrates. *Desulfitobacterium*  
116 *hafniense* DCB-2<sup>32</sup> and *E. coli* JM109 were cultivated in medium described previously. The medium  
117 composition of the co-culture of *S. multivorans* and *Methanococcus voltae* DSMZ 1537 was identical  
118 to that described by Whitman *et al.*<sup>32</sup>, except that 5 g L<sup>-1</sup> NaCl were added. Electron donor was 15 mM  
119 lactate. *C. pasteurianum* W5, *D. hafniense* DCB-2 and *E. coli* JM109 were taken from the strain  
120 collection of our laboratory and *M. voltae* was obtained from the German Collection of Microorganism  
121 (DSMZ, Braunschweig, Germany).

## 122 **Cell harvesting and preparation of cell suspensions and subcellular fractions**

123 *S. multivorans*, *S. cavolei* and *C. pasteurianum* W5 cells were harvested in the mid-exponential growth  
124 phase in an anoxic glove box (COY, 134 Laboratory, Grass Lake, Michigan, USA) by centrifugation  
125 (12,000 x g, 10 min at 10°C). For the preparation of cell suspensions, the obtained cell pellets were  
126 washed twice in anoxic 100 mM MOPS-KOH-buffer (pH 7.0) and resuspended in two volumes (2 mL  
127 per g cells) of the same buffer. Subcellular fractionation was done by washing the cell pellet twice in

128 50 mM Tris-HCl (pH 8.0) and resuspension (2 mL per g cells) in the same buffer containing DNaseI  
129 (AppliChem, Darmstadt, Germany) and protease inhibitor (one tablet for 10 mL buffer; complete Mini,  
130 EDTA-free; Roche, Mannheim, Germany). The resuspended cells were disrupted using a beadmill  
131 (10 min at 25 Hz; MixerMill MM400, Retsch GmbH, Haan, Germany) with an equal volume of glass  
132 beads (0.25–0.5 mm diameter, Carl Roth GmbH, Karlsruhe, Germany). The crude extracts were  
133 separated from the glass beads by centrifugation (14,000 x g, 2 min) under anaerobic conditions and  
134 ultracentrifuged (36,000 x g, 45 min at 4°C). The obtained supernatants were considered as soluble  
135 fractions (SF). The pellets were washed twice with 50 mM Tris-HCl (pH 8.0) including protease inhibitor  
136 and resuspended in the same buffer. The suspension was stated as membrane fraction (MF).

### 137 **Measurement of hydrogenase activity**

138 H<sub>2</sub> oxidizing activity was measured in H<sub>2</sub>-saturated buffer (50 mM Tris-HCl, pH 8.0) with 1 mM benzyl  
139 viologen (BV) or methyl viologen (MV) at 30°C as artificial electron acceptors. The reduction of the  
140 redox dyes was followed at 578 nm using a Cary 100 spectrophotometer (Agilent Technologies,  
141 Waldbronn, Germany). H<sub>2</sub>-evolving activities of cell extracts were determined gas chromatographically  
142 with 1 mM methyl viologen as electron donor: MV was reduced with 20 mM sodium dithionite in an  
143 anoxic buffer system (50 mM Tris-HCl, pH 8.0). Protein concentration was determined according to the  
144 method of Bradford<sup>33</sup>. Hydrogenase enzyme activities are given in nanokatal units (1 nmol H<sub>2</sub> evolved  
145 per second).

### 146 **Analytical methods**

147 Liquid samples were taken anaerobically, filtered with 0.2 µm-syringe filters (MiniSart RC4, Sartorius,  
148 Göttingen, Germany) and acidified with concentrated H<sub>2</sub>SO<sub>4</sub> (2.5 µL mL<sup>-1</sup> sample volume). Organic  
149 acids were separated at 50°C on an AMINEX HPX-87H column (7.8 x 300 mm, BioRad, Munich,  
150 Germany) with a cation H guard pre-column using 5 mM H<sub>2</sub>SO<sub>4</sub> as mobile phase at a flow rate of  
151 0.7 mL min<sup>-1</sup>. The injection volume was 20 µL per sample. All acids (e.g. pyruvate, acetate, lactate,  
152 succinate and fumarate) were monitored by their absorption at 210 nm. Retention times were  
153 compared to known standards and concentrations were calculated using calibration curves. H<sub>2</sub> was  
154 measured gas chromatographically with 99.999% argon as the carrier gas using a thermal conductivity  
155 detector (AutoSystem, Perkin Elmer, Berlin, Germany). Samples for gas analysis were taken from the  
156 gas phase with gas-tight syringes (Hamilton, Bonaduz, Switzerland). Concentrations were calculated

157 using calibration curves. CO<sub>2</sub> formed during the cultivation was determined gravimetrically. To 15 mL  
158 of the solution of the CO<sub>2</sub> trap 7.5 mL NH<sub>4</sub>Cl (1 M) and 15 mL BaCl<sub>2</sub> (1 M) were added and the pH was  
159 adjusted to 9 with concentrated HCl (37%). After stirring for 2 h at room temperature, the precipitated  
160 barium carbonate was filtered with filter circles and dried over night at 80°C.

### 161 **Field emission-scanning electron microscopy (FE-SEM)**

162 Field emissionscanning electron microscopy (FE-SEM) was performed with co-cultures of  
163 *S. multivorans* and *Methanococcus voltae*. After incubation of 3 mL culture in 2.5% glutaraldehyde for  
164 15 min, the cells were pre-fixed for 2 h on poly-L-lysine coated cover slides (12 mm, Fisher Scientific,  
165 Schwerte, Germany). Washing of cover slides was done using 0.1 M sodium cacodylate (pH 7.2)  
166 (>98% purity, Sigma Aldrich, Steinheim, Germany) for three times. Subsequently, cells were post-fixed  
167 with 1% osmium tetroxide in the same cacodylate buffer and dehydrated with different ethanol  
168 concentrations. Critical point drying was done in a Leica EM CPD200 Automated Critical Point Dryer  
169 (Leica, Wetzlar, Germany) and the samples were coated with 6 nm platinum in a BAL-TEC MED 020  
170 Sputter Coating System (BAL-TEC, Balzers, Liechtenstein). They were visualized at different  
171 magnifications using a Zeiss-LEO 1530 Gemini field emission scanning electron microscope (Carl  
172 Zeiss, Oberkochen, Germany).

### 173 **Sample preparation, mass spectrometry and proteome data analysis**

174 Protein concentration of extracted proteins was determined using a Bradford reagent (Bio-Rad,  
175 Munich, Germany) with bovine serum albumin as standard. For protein identifications 20 µg of crude  
176 extracts were first cleaned from cations and cell debris by running shortly into an SDS gel. For this, the  
177 gel was run at 13 mA until the proteins entered the separating gel at a depth of about 3-5 mm. Then  
178 the protein band was cut out, reduced, alkylated and proteolytically digested with trypsin (Promega,  
179 Madison, WI, USA) and subsequently desalted with C18 ZipTips as described<sup>34</sup>.

180 Mass spectrometry was performed using an Orbitrap Fusion (Thermo Fisher Scientific, Waltham, MA,  
181 USA) coupled to a TriVersa NanoMate (Advion, Ltd., Harlow, UK). 5 µL of the peptide solution were  
182 separated using a Dionex Ultimate 3000 nano-LC system (Dionex/Thermo Fisher Scientific, Idstein,  
183 Germany). A sample volume of 1 µL was loaded onto a trapping column (300 µm inner diameter,  
184 packed with 5 µm C18 particles, Thermo Scientific) and separated on 15 cm analytical column  
185 (Acclaim PepMap RSLC, 2 µm C18 particles, Thermo Scientific) at 35°C. Liquid chromatography was

186 done with a constant flow of 300 nL min<sup>-1</sup> with a mixture of solvent A (0.1% formic acid) and B (80%  
187 acetonitrile, 0.08% formic acid) in a linear 90 min gradient of 4% to 55% solvent B.

188 MS1 scans were measured with a cycle time of 3 s in the Orbitrap mass analyzer between 350 and  
189 2,000 *m/z* at a resolution of 120,000, automatic gain control (AGC) target  $4 \times 10^5$ , maximum injection  
190 time 50 ms. Data-dependent acquisition (DDA) was employed selecting for highly intense ions  
191 ( $>5 \times 10^4$ ) and charge state between +2 and +7 with a precursor ion isolation windows of 1.6 *m/z*.  
192 Fragmentation was done via higher energy dissociation (HCD) at 30% energy, and also measured in  
193 the Orbitrap analyzer at a resolution of 120,000 with an AGC target of  $5 \times 10^4$  and a maximum injection  
194 time of 120 ms. Fragmentation events were done within the 3 s of cycle time until the next MS1 scan  
195 was done excluding the same mass ( $\pm 10$  ppm) for further precursor selection for 45 s.

196 Mass spectrometric data were analyzed with Proteome Discoverer 1.4 (Thermo Scientific) against the  
197 NCBI *S. multivorans* database (CP007201.1) with the search engines SequestHT and MS Amanda.  
198 Oxidation of methionine was set as dynamic, carbamidomethylation of cysteine as static modification;  
199 two missed cleavages were accepted, mass tolerance of MS1 and MS2 measurements were set to  
200 5 ppm and 0.05 Da, respectively. A percolator false discovery rate (FDR) threshold of  $<0.01$  was set  
201 for peptide identification. Label-free quantification of proteins was done with the area of the three most  
202 abundant peptides of each protein. The values were logarithmized ( $\log_{10}$ ) and normalized (see  
203 Supplementary Dataset 1) and a two-tailed T-test was applied. Significance values (p-values) of  $<0.05$   
204 were considered to indicate statistical significance. Only proteins identified in at least 50% of the three  
205 replicates ( $n \geq 2$ ) were used for quantification, otherwise, proteins were considered to be identified.

206



## 207 Results

### 208 1. Adaptation of *Sulfurospirillum multivorans* to pyruvate-fermenting conditions

209 In previous studies, *S. multivorans* and other *Sulfurospirillum* spp. were shown to grow fermentatively  
210 on pyruvate<sup>23,30,35</sup>. Only few data on growth behavior are available in the literature, but *S. multivorans*  
211 was reported to exhibit poor growth on pyruvate as sole energy source compared to respiratory growth  
212 with fumarate or tetrachloroethene (PCE) as electron acceptor<sup>30</sup>. However, we observed an adaptation  
213 of *S. multivorans* to fermentative growth on pyruvate. After about twenty transfers, a growth rate of  
214  $0.09\text{ h}^{-1}$  was determined (growth rate on pyruvate/fumarate,  $0.19\text{ h}^{-1}$ , Figure 1). During the adaptation  
215 to pyruvate fermentation, the growth rate increased on average by  $0.02\text{ h}^{-1}$  with each transfer  
216 (Supplementary Figure 3). In addition, the lag phase duration decreased from initially 40h to 5h. After  
217 18 transfers, no further significant increase of the growth rate was observed. This adaptation process  
218 was also observed for *S. cavolei*, *S. delyianum* and *S. arsenophilum*. For *S. barnesii* and  
219 *S. halorespirans*, no growth on pyruvate alone was detected, even after several subcultivation steps.

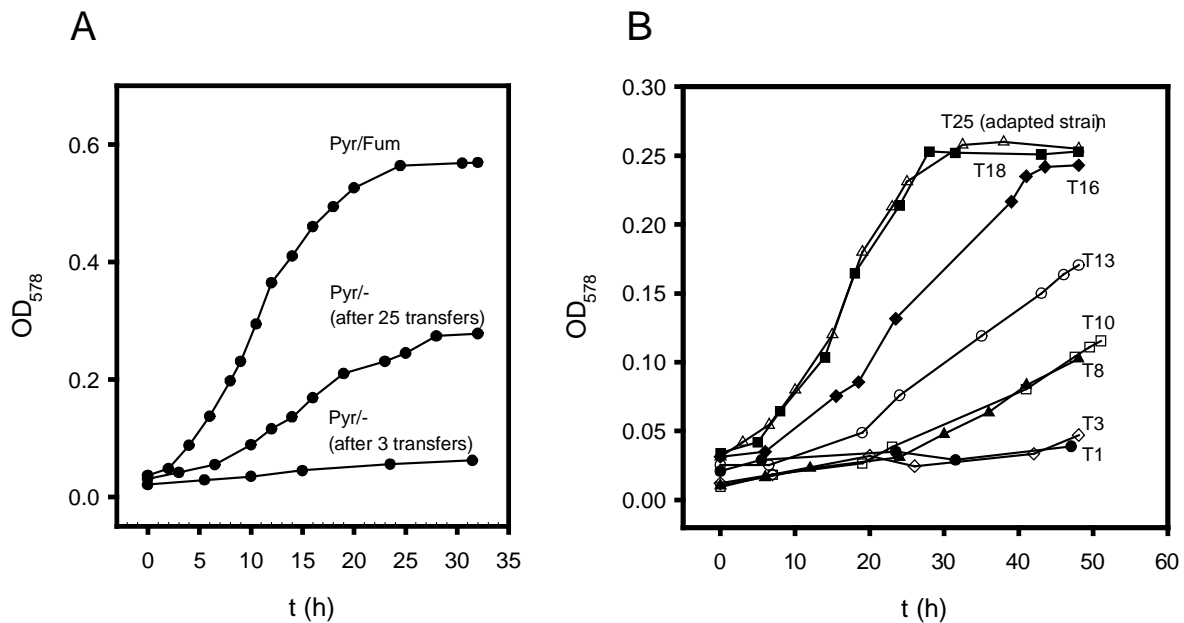

220

221 **Figure 1: Adaptation of *S. multivorans* to pyruvate-fermenting conditions.** A) Growth curves with pyruvate as  
222 sole growth substrate after three and twenty-five transfers; A culture with pyruvate/fumarate after three transfers  
223 is shown for comparison. B) Growth during continuous transfer on pyruvate without electron acceptor. Each  
224 transfer (10% inoculum) was done after 48 hours cultivation. Data were obtained from at least two independent  
225 biological replicates and are representatives. T - number of transfer step, Pyr - pyruvate, Fum - fumarate, OD<sub>578</sub> -  
226 optical density at 578 nm.

227

## 228 2. Fermentative growth and H<sub>2</sub> production of *Sulfurospirillum* spp.

229 To get deeper insight into the fermentation pathways and H<sub>2</sub> production capabilities of *Sulfurospirillum*  
230 spp., several species were cultivated with pyruvate as sole substrate. Six species were tested for  
231 pyruvate fermentation, of which *S. barnesii* and *S. halorespirans* were not able to grow even after  
232 cultivation for several months (data not shown). *S. cavolei*, *S. deleyianum* and *S. arsenophilum* were  
233 able to grow on pyruvate alone, albeit at slower rates than *S. multivorans* (0.03 h<sup>-1</sup>, 0.06 h<sup>-1</sup>, or  
234 0.004 h<sup>-1</sup>, respectively). H<sub>2</sub> production was measured for all fermentatively growing *Sulfurospirillum*  
235 spp., but the produced amount differed, depending on the species. *S. cavolei* produced the highest  
236 amount of H<sub>2</sub> followed by *S. arsenophilum*. *S. deleyianum* and *S. multivorans* produced about  
237 100 μmol per 100 mL culture. *D. hafniense* DCB-2, a known pyruvate-fermenting organohalide-  
238 respiring bacterium grows similar to *Sulfurospirillum* spp. (Figure 2A) but produced only minor  
239 amounts of H<sub>2</sub> (20 μmol) (Figure 2b). Fermentative growth on lactate was not observed for any of the  
240 organisms including *D. hafniense* DCB-2 even after cultivation for several months (data not shown).

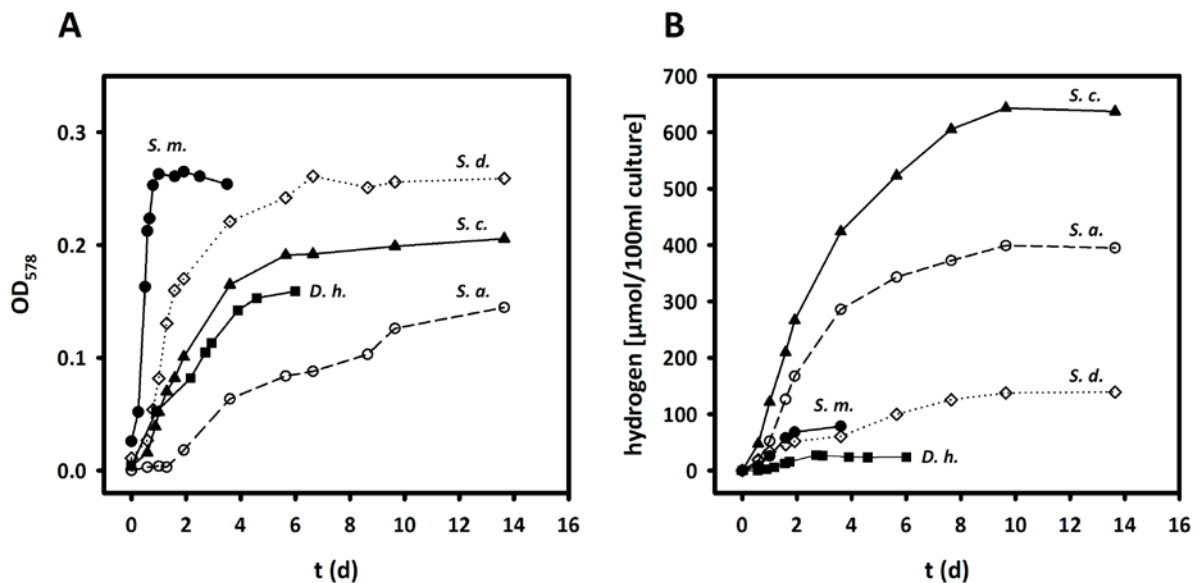

241  
242 **Figure 2: Growth (A) and H<sub>2</sub> production (B) of *Sulfurospirillum* spp. and *D. hafniense* strain DCB-2 during**  
243 **fermentative growth on pyruvate after adaptation.** The graph is a representative of three independent  
244 replicates. *S.m.* - *S. multivorans*, *S.d.* - *S. deleyianum*, *S.c.* - *S. cavolei*, *S.a.* - *S. arsenophilum*, *D.h.* -  
245 *D. hafniense* DCB-2.

246

## 247 3. Fermentative metabolism of *S. multivorans* and *S. cavolei*

248 To unravel the fermentative metabolism of two *Sulfurospirillum* spp. showing a different H<sub>2</sub> production  
249 pattern during growth on pyruvate, *S. multivorans* and *S. cavolei* were cultivated in a fermentation

250 apparatus in which the gas phase of the Schott bottle was connected to CO<sub>2</sub> and H<sub>2</sub> traps (see  
251 Supplementary Figure 2) to avoid increasing gas partial pressures and hence a possible product  
252 inhibition on H<sub>2</sub> production or growth (see also next chapter). Fermentation products and pyruvate  
253 consumption were monitored via HPLC, GC, volumetric and gravimetric measurements in order to  
254 calculate the fermentation balance. In this experimental set up, a largely enhanced H<sub>2</sub> evolution was  
255 measured when compared to the serum bottle experiment, with up to hundred times more H<sub>2</sub>  
256 produced, while the growth was slower than in the previous set up (Figure 3A). After consumption of  
257 40 mM pyruvate, 27 mM acetate, 10 mM lactate, 3 mM succinate, 10 mM H<sub>2</sub> and 28 mM CO<sub>2</sub> were  
258 measured as fermentation products of *S. multivorans* (Figure 3A). *S. cavolei* showed slower growth  
259 than *S. multivorans* and a much higher amount of H<sub>2</sub> evolved. During growth, which took 8 to 10 days,  
260 pyruvate (40 mM) was used up completely and 38 mM acetate, 36 mM H<sub>2</sub> and 38 mM CO<sub>2</sub> were the  
261 only products detected (Figure 3B). *S. deleyianum* showed similar fermentation products to  
262 *S. multivorans* (Supplementary Figure 4). The stoichiometry of the fermentation was verified by  
263 calculating the carbon recovery and an oxidation/reduction balance (Supplementary Table 1, Eqns (I)  
264 and (II)). In *S. multivorans*, the amount of reducing equivalents generated from pyruvate oxidation was  
265 calculated to be 54 [H], which fits to the amount of used reducing equivalents for the production of  
266 molecular hydrogen, lactate and succinate (52 [H], Supplementary Table 1). In *S. cavolei*, pyruvate  
267 oxidation leads to the generation of 76 [H], which were almost exclusively (72 [H]) used for proton  
268 reduction to H<sub>2</sub>. In addition, the carbon recovery is in agreement with the theoretical values and is  
269 102.5% for *S. multivorans* and 95% for *S. cavolei*. The anabolic assimilation of the carbon source  
270 could be neglected due to the low amount of biomass produced.

271

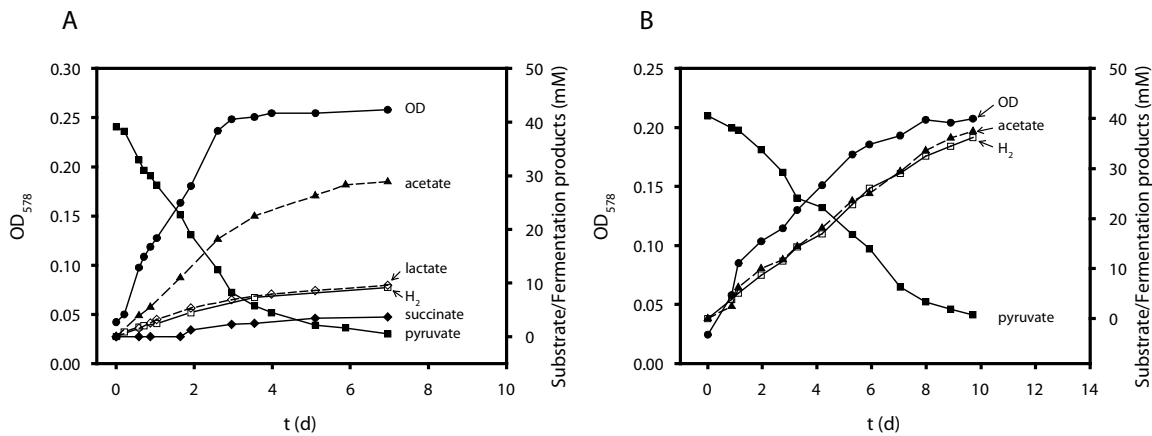

272  
 273 **Figure 3: Fermentation balance of *S. multivorans* (A) and *S. cavolei* (B) during fermentative growth on**  
 274 **pyruvate.** Organic acids were measured via HPLC and H<sub>2</sub> was determined volumetrically (for details see  
 275 Materials and Methods).

276

277 Eqn. (I) 1 Pyruvate → 0.7 Acetate + 0.25 Lactate + 0.075 Succinate + 0.25 H<sub>2</sub> + 0.7 CO<sub>2</sub>

278 Eqn. (II) 1 Pyruvate → 0.95 Acetate + 0.9 H<sub>2</sub> + 0.95 CO<sub>2</sub>

279

#### 280 4. Product inhibition by H<sub>2</sub> on fermentative growth in *S. cavolei* and *S. multivorans*

281 The different amount of H<sub>2</sub> produced in the growth experiments in serum bottles and the fermentation  
 282 apparatus imply a product inhibition of H<sub>2</sub> on H<sub>2</sub> production. To investigate the effect of H<sub>2</sub> in the gas  
 283 phase on the fermentative growth of *S. multivorans* and *S. cavolei*, both organisms were cultivated in  
 284 serum bottles with a gas phase of 100% H<sub>2</sub> or 100% nitrogen (Figure 4). With nitrogen as gas phase,  
 285 *S. multivorans* and *S. cavolei* showed similar growth and production rates of organic acids as  
 286 observed in the fermentation apparatus. A strong negative effect on growth was observed with  
 287 100% H<sub>2</sub> in the gas phase. *S. multivorans* was still able to ferment pyruvate but showed an inhibited  
 288 growth and a lower cell density compared to the culture without H<sub>2</sub> in gas phase, while *S. cavolei* was  
 289 almost completely inhibited (Figure 4A). The restricted growth is also reflected by a lower pyruvate  
 290 consumption rate (Figure 4B). In addition, the formation of fermentation products shifted from acetate  
 291 production to lactate and succinate formation in *S. multivorans* (Figure 4C-E). *S. cavolei* produced  
 292 neither lactate nor succinate and only minor amounts of acetate.

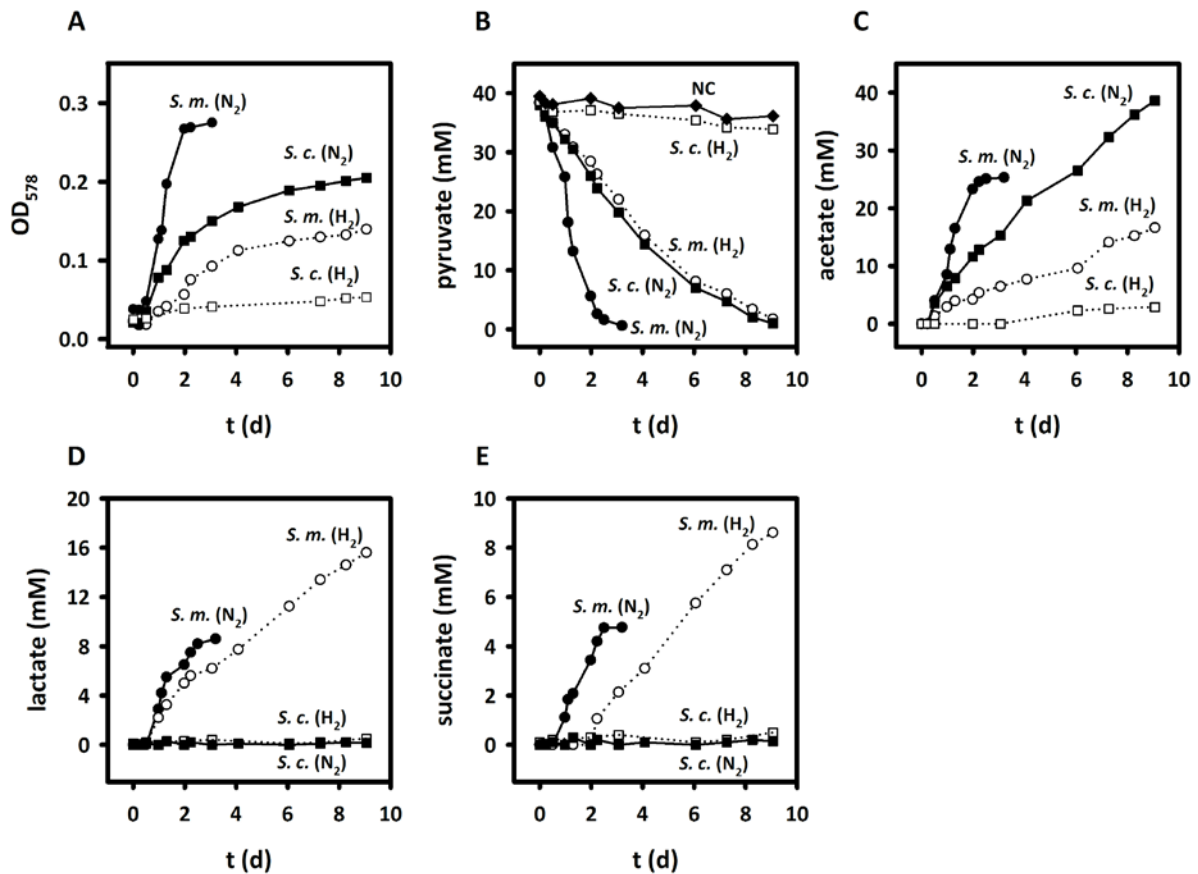

293  
294 **Figure 4: Growth and formation of fermentation products during cultivation under 100% nitrogen (N<sub>2</sub>) and**  
295 **100% H<sub>2</sub> atmosphere with pyruvate as sole energy source.** Growth curve (A), pyruvate consumption (B) and  
296 acetate (C), lactate (D) and succinate (E) production are shown. Organic acids were measured via HPLC. Each  
297 cultivation was conducted in three biological replicates. S.m. - *S. multivorans*, S.c. - *S. cavolei*, N<sub>2</sub> - nitrogen, H<sub>2</sub> -  
298 hydrogen, NC - negative control (cell-free medium).

299

### 300 5. Hydrogenase activities by cell suspensions of *Sulfurospirillum* spp.

301 The H<sub>2</sub> production and oxidation capability of cell suspensions of *S. multivorans* and *S. cavolei* was  
302 analyzed to obtain further evidence about the hydrogenase involved in the production and oxidation  
303 reaction. Transcriptional and proteomic studies revealed the presence of two [NiFe] hydrogenases in  
304 *S. multivorans*<sup>29</sup>: a hydrogen-oxidizing periplasmic membrane-bound hydrogenase (MBH) and a  
305 putative H<sub>2</sub>-producing cytoplasmic membrane-bound hydrogenase (Hyf). These two hydrogenases  
306 might be distinguished by their different subcellular localization in hydrogenase activity assays.  
307 Photometrically measured H<sub>2</sub>-oxidizing activity was detected in whole cell suspensions as well as in  
308 membrane and soluble fractions (Table 1). In contrast, H<sub>2</sub>-producing activity, as monitored by GC, was  
309 only measured with membrane fractions of *S. multivorans* and *S. cavolei* with approximately 1.5-fold  
310 higher activity in the latter one. This suggests a cytoplasmic orientation of a membrane-associated  
311 H<sub>2</sub>-evolving hydrogenase, since methyl viologen should not have access to the cytoplasm of whole

312 cells (Table 1). The H<sub>2</sub>-oxidizing activity of intact cells points towards a catalytic subunit accessible to  
 313 benzyl and methyl viologen and, thus, a periplasmic orientation of the H<sub>2</sub> uptake system. The  
 314 membrane fractions of *S. multivorans* and *S. cavolei* cells grown on pyruvate as sole energy source  
 315 were about 2-fold more active in H<sub>2</sub>-production than those of cells cultivated under respiratory growth  
 316 conditions with pyruvate plus fumarate, while the latter exhibited slightly more H<sub>2</sub> oxidation activity.  
 317 *Clostridium pasteurianum* W5, which is known to harbor a soluble H<sub>2</sub>-producing hydrogenase,  
 318 exhibited hydrogenase activity only in the soluble fractions and showed no H<sub>2</sub> producing activity in cell  
 319 suspensions with methyl viologen as electron donor (Supplementary Table 2), thus serving as a  
 320 control for the hydrogenase localization experiment.

321 **Table 1: Hydrogen-production and oxidizing activities of cell suspensions and subcellular fractions of**  
 322 ***S. multivorans* and *S. cavolei* cultivated under different growth conditions.** Data are derived from three  
 323 independent biological replicates.

| Cellular fraction         | Hydrogenase activity (nkat mg <sup>-1</sup> ) |                     |                     |                     |                     |                     |
|---------------------------|-----------------------------------------------|---------------------|---------------------|---------------------|---------------------|---------------------|
|                           | <i>S. multivorans</i>                         |                     |                     | <i>S. cavolei</i>   |                     |                     |
|                           | MV → H <sub>2</sub>                           | H <sub>2</sub> → BV | H <sub>2</sub> → MV | MV → H <sub>2</sub> | H <sub>2</sub> → BV | H <sub>2</sub> → MV |
| <b>Cell suspensions</b>   |                                               |                     |                     |                     |                     |                     |
| Pyr                       | < 0.01                                        | 4.1 ± 0.5           | 0.7 ± 0.3           | < 0.01              | 5.5 ± 0.6           | 1.4 ± 0.3           |
| <b>Membrane fractions</b> |                                               |                     |                     |                     |                     |                     |
| Pyr                       | 12.3 ± 2.4                                    | 23.5 ± 2.1          | n.d.                | 20.6 ± 3.7          | 10.1 ± 0.5          | n.d.                |
| Pyr + Fum                 | 5.7 ± 1.5                                     | 36.6 ± 3.3          | n.d.                | 10.1 ± 2.4          | 13.5 ± 1.6          | n.d.                |
| <b>Soluble fractions</b>  |                                               |                     |                     |                     |                     |                     |
| Pyr                       | < 0.01                                        | n.d.                | n.d.                | < 0.01              | n.d.                | n.d.                |
| Pyr + Fum                 | < 0.01                                        | 2.3 ± 0.3           | n.d.                | < 0.01              | 1.9 ± 0.3           | n.d.                |

324 MV → H<sub>2</sub> indicates H<sub>2</sub> formation activity, H<sub>2</sub> → BV/MV indicates H<sub>2</sub> oxidation. MV - methyl viologen, BV - benzyl  
 325 viologen. Pyr - pyruvate, Fum - fumarate, n.d. - not determined

326

## 327 6. Comparative genomics and proteomics

328 To unravel the cause of the different fermentative metabolism of the two *Sulfurospirillum* sp., a  
 329 comparative genomic analysis was done with the RAST sequence comparison tool<sup>36</sup>. Additionally,  
 330 proteomes of *S. cavolei* NRBC109482 and *S. multivorans* cultivated under fermenting and respiring  
 331 conditions with fumarate as electron acceptor were analyzed. Bidirectional blast hits with more than  
 332 50% amino acid sequence identity were considered as orthologs, proteins putatively fulfilling the same  
 333 functions in both organisms. The genomes were overall similar, with 2057 of 2768 of the encoded  
 334 proteins in *S. cavolei* being orthologs. Only few of the non-orthologous proteins in *S. cavolei* could be  
 335 considered to play a role in the fermentation. Among the proteins encoded in the *S. cavolei* genome

336 (annotated RefSeq WGS accession number NZ\_AP014724), which do not have an ortholog in  
337 *S. multivorans*, we found a cluster encoding an [FeFe] hydrogenase known to contribute to  
338 fermentative H<sub>2</sub> production in many bacteria, e.g. Clostridia (Supplementary Figure 5). A nearly  
339 identical gene cluster is found in the other two genomes of *S. cavolei* strains UCH003 and MES, the  
340 latter of which was assembled from a metagenome<sup>19</sup>. The large hydrogenase subunit gene, *hydA*, is  
341 disrupted by a stop codon resulting from a nucleotide insertion only in *S. cavolei* strain NRBC109482.  
342 The mutation was confirmed by PCR and Sanger sequencing. Transcript analysis of *hydA* suggested  
343 that mRNA of the [FeFe] hydrogenase active subunit gene was synthesized under pyruvate-  
344 fermenting growth conditions (Supplementary Figure 6). However, the [FeFe] hydrogenase was not  
345 identified in the proteome of *S. cavolei*.

346 Of the proteins related to pyruvate metabolism, a pyruvate,water dikinase (phosphoenolpyruvate  
347 [PEP] synthetase) is encoded in the genome of *S. multivorans* (encoded by SMUL\_1602), but not in  
348 *S. cavolei*. This enzyme is responsible for the ATP-dependent synthesis of phosphoenolpyruvate from  
349 pyruvate in gluconeogenesis. The PEP synthetase was found in 6.3-fold higher abundance (p-value  
350 0.02) in the proteome of fermentatively cultivated *S. multivorans* cells (Supplementary Table 3). In  
351 *S. cavolei*, PEP might be formed from pyruvate via oxaloacetate by two reactions catalyzed by  
352 pyruvate carboxylase and PEP carboxykinase. These two enzymes are encoded in one gene cluster  
353 (SCA02S\_RS02520 and SCA02S\_RS02525, respectively, Supplementary Figure 7). In *S. multivorans*  
354 these proteins (SMUL\_0789 and SMUL\_0791) cluster with a gene encoding a subunit similar to the  
355 membrane subunit of a putative Na<sup>+</sup>-translocating oxaloacetate decarboxylase (SMUL\_0790), of which  
356 an ortholog is not encoded in *S. cavolei* (Supplementary Figure 7). Both pyruvate  
357 carboxylase/oxaloacetate decarboxylase and PEP carboxykinase were found in the proteomes of both  
358 organisms in slightly higher amounts in cells grown with pyruvate only (Supplementary Dataset 2).  
359 Interestingly, also *S. arsenophilum*, producing larger amounts of H<sub>2</sub> than *S. multivorans* (Figure 2),  
360 lacks the putative oxaloacetate decarboxylase subunit gene (Supplementary Figure 7).

361 The Hyf hydrogenase was found in high abundancies especially in the proteome of *S. multivorans*  
362 cultivated with pyruvate alone. Here, four out of eight of the structural subunits were found in the 10%  
363 of the most abundant proteins, while none were found in the top 10% under respiratory conditions. In  
364 *S. cavolei*, the hydrogenase-4 subunits were not as abundant as in *S. multivorans* with only two out of  
365 six quantified subunits in the top 20% (Supplementary Dataset 2). In both organisms, a significantly



366 higher amount of Hyf subunits was quantified under fermentative growth conditions (*S. multivorans*: 4-  
367 to 27-fold for the structural subunits HyfA-HyfI, all p-values are <0.001, *S. cavolei*: 2- to 5-fold for  
368 HyfA-HyfI, all p-values are <0.05; Figure 5, Supplementary Table 3, Supplementary Dataset 2).  
369 Interestingly, the Hyf gene cluster is disrupted at one site in *S. halorespirans*, which cannot grow on  
370 pyruvate alone. Genome sequencing<sup>37</sup> revealed a transposase insertion at *hyfB* which might result in a  
371 non-functional gene *S. halorespirans*. The transposon insertion was confirmed by PCR using *hyfB*-  
372 specific primers flanking the transposase (Supplementary Figure 9). The membrane-bound subunits  
373 HyfE and HyfF were found in fermenting cells of *S. multivorans* exclusively. Sequence comparison of  
374 the Hyf-like hydrogenase of *S. multivorans* shows similarities to the formate hydrogen lyase complex  
375 of *E. coli* and to complex I of *Thermus thermophilus* (Supplementary Figure 8). An analysis of the  
376 potential proton-translocating sites in Hyf of *S. multivorans* and a comparison to the FHL of *E. coli* and  
377 the related subunits of several complex I is given in the Supplementary information (Supplementary  
378 Note 1, Supplementary Table 5 and Supplementary Figures 10 - 12).

379 A search for the *hyf* gene cluster in genomes of Epsilonproteobacteria shows that it is ubiquitous in,  
380 but not limited to, *Sulfurospirillum* spp (Supplementary Table 4). Four out of 15 *Sulfurospirillum* sp.  
381 genomes harbor a second *hyf* gene cluster co-located with genes encoding a formate transporter and  
382 a formate dehydrogenase (Supplementary Figure 1). In *Arcobacter* spp. and the marine species  
383 *Caminibacter mediatlanticus* and *Lebetimonas* spp., only the latter gene cluster encoding a putative  
384 FHL complex is found. In several *Campylobacter* spp. including *C. concisus*, a *hyf* gene cluster with a  
385 formate transporter gene was identified (Supplementary Figure 1), while a second group of  
386 *Campylobacter* (including *C. fetus*) does not encode any formate-related proteins (Supplementary  
387 Table 4).

388 A pyruvate:ferredoxin oxidoreductase (PFOR) and a ferredoxin (Fd) showed also a higher abundance  
389 in both *Sulfurospirillum* sp. under fermenting conditions (*S. multivorans*: PFOR 2-fold, Fd 6-fold,  
390 *S. cavolei*: PFOR 4-fold, Fd 2-fold, all p-values are <0.01; Figure 5, Supplementary Table 3). A second  
391 pyruvate-oxidizing enzyme, a quinone-dependent pyruvate dehydrogenase encoded exclusively in the  
392 genome of *S. multivorans*, was significantly lower abundant during pyruvate fermentation (7-fold,  
393 p-value 0.02). The enzymes responsible for ATP generation via substrate-level phosphorylation,  
394 phosphotransacetylase and acetate kinase, are slightly higher abundant during pyruvate fermentation  
395 in both *Sulfurospirillum* sp. (approximately 2-fold for both enzymes in *S. multivorans*, p-values are



396 <0.01 and approximately 3-fold in *S. cavolei*, p-values are <0.001; Figure 7, Supplementary Table 3).  
397 The malic enzyme is higher abundant during fermentation in *S. multivorans* (3.7-fold, p-value <0.001,  
398 Supplementary Table 3) and not quantified in any proteome of *S. cavolei* (Supplementary Table 3).  
399 The fumarate hydratase is found in lower abundancies during fermentation in both organisms  
400 (*S. multivorans*: 2-fold, p-values <0.01, *S. cavolei*: 6-fold, p-values <0.001), while the fumarate  
401 reductase is significantly lower abundant only in *S. cavolei* (*S. cavolei*: approximately 6-fold, p-values  
402 <0.001). The subunits of the membrane-bound hydrogenase (MBH) were quantified in either  
403 insignificantly lower amounts (HydAB, approximately 2-fold, p-values 0.40 and 0.07) or slightly higher  
404 amounts (HydC, approximately 2-fold, p-value 0.01) under fermenting conditions for *S. multivorans*. In  
405 contrast, HydABC were found to in significantly lower amounts in *S. cavolei* when grown  
406 fermentatively. Of the cytoplasmic H<sub>2</sub>-producing hydrogenase (Ech-like), only one subunit was  
407 quantified in *S. multivorans* grown with pyruvate alone; this subunit was classified in the lower 50%  
408 abundant proteins. In *S. cavolei*, five of six Ech-like hydrogenase subunits were quantified in cells  
409 cultivated with pyruvate alone and two of six subunits in pyruvate/fumarate-cultivated cells, all of the  
410 Ech-like subunits were found in the lowest third abundant proteins. No subunit of the cytoplasmic  
411 uptake hydrogenase (HupSL) was found in any of the proteomes.

412 A putative lactate dehydrogenase (SMUL\_0438, SCA02S\_RS08360) with 35% amino acid sequence  
413 identity to a characterized lactate-producing lactate dehydrogenase from *Selenomonas ruminantium*<sup>38</sup>  
414 was not detected in any proteome. This is in accordance to the lack of pyridine dinucleotide-  
415 dependent lactate-oxidizing or pyruvate-reducing activities in cell extracts of *S. multivorans* (data not  
416 shown, methods described in the Supplement). Several candidates for pyridine dinucleotide-  
417 independent lactate dehydrogenases (iLDH) are encoded in the genome of *S. multivorans*. Since  
418 *S. deleyianum* shows also lactate production during pyruvate fermentation, only genes present as  
419 orthologs in both genomes were considered to be responsible for lactate production in *Sulfurospirillum*  
420 spp. Functionally characterized iLDHs are flavin and FeS-cluster-containing oxidoreductases<sup>40</sup> or  
421 enzymes related to malate:quinone oxidoreductase<sup>40</sup>. Only two candidates of the former class were  
422 identified in the genome, encoded by SMUL\_1449 and SMUL\_2229. Of these, only the latter gene  
423 product was detected in the proteome, however, not in altered amounts under fermentative conditions  
424 when compared to respiratory cultivation.

425

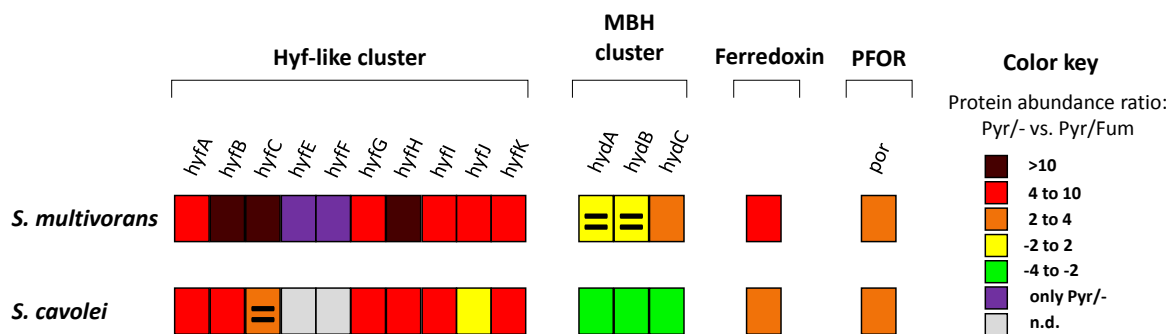

426

427 **Figure 5: Comparative proteomics of proteins possibly involved in pyruvate fermentation of**  
 428 ***S. multivorans* and *S. cavolei*.** Comparison of cells grown with pyruvate alone (fermentative conditions) was  
 429 done with cells grown with pyruvate/fumarate (standard = respiratory conditions). For quantified proteins the  
 430 protein intensity is given as coloured squares. Non-significantly altered proteins are marked with an equal sign.  
 431 Proteins exclusively found in pyruvate fermenting cells are colored light blue. All data were obtained from 3  
 432 independent biological replicates. Ratios in dashed boxes not significantly altered (p-values >0.05). Hyf-like - Hyf  
 433 hydrogenase (SMUL\_2383-2392; SCA02S\_RS01920-RS01965), MBH - membrane-bound hydrogenase  
 434 (SMUL\_1423-1425; SCA02S\_RS01350-RS01360), Fd - ferredoxin (SMUL\_0303; SCA025\_RS12260), PFOR -  
 435 pyruvate:ferredoxin-oxidoreductase (SMUL\_2630; SCA02S\_RS04525). Pyr - pyruvate, Fum - fumarate.  
 436

## 437 7. *Sulfurospirillum multivorans* as a syntrophic partner for *Methanococcus voltae*

438 To unravel the potential role of *S. multivorans* in a syntrophic partnership as H<sub>2</sub> producer, a co-culture  
 439 with *Methanococcus voltae* was prepared. *M. voltae* is a methanogenic archaeon dependent on H<sub>2</sub> or  
 440 formate as electron donor and CO<sub>2</sub> as electron acceptor<sup>32</sup>. To investigate the syntrophic interaction of  
 441 the two organisms, the co-culture was cultivated with lactate, which could not serve as a fermentation  
 442 substrate for pure *S. multivorans* cultures. A syntrophic, hydrogen-consuming partner keeping H<sub>2</sub>  
 443 concentration at a low level in co-cultures might render lactate fermentation by *S. multivorans*  
 444 thermodynamically feasible in a co-culture. In the corresponding co-culture, 15 mM lactate was  
 445 consumed in approximately two weeks, indicating lactate fermentation by *S. multivorans* and H<sub>2</sub>  
 446 transfer to *M. voltae* as syntrophic partner (Figure 6 A,B). Formation of methane was measured gas-  
 447 chromatographically (data not shown). Electron microscopic analyses of the co-culture revealed cell  
 448 aggregates with sizes between 50 and 600 μm (Figure 6C, Supplementary Figure 13). These  
 449 aggregates showed a compact network of the rod-shaped *S. multivorans* and coccoidal *M. voltae* with  
 450 net-forming flagellum-like structures surrounding the organisms. The cells in the aggregates are  
 451 embedded in extracellular polymeric substances (EPS)-like structures, which might aid cell-to-cell  
 452 contact.

453

454

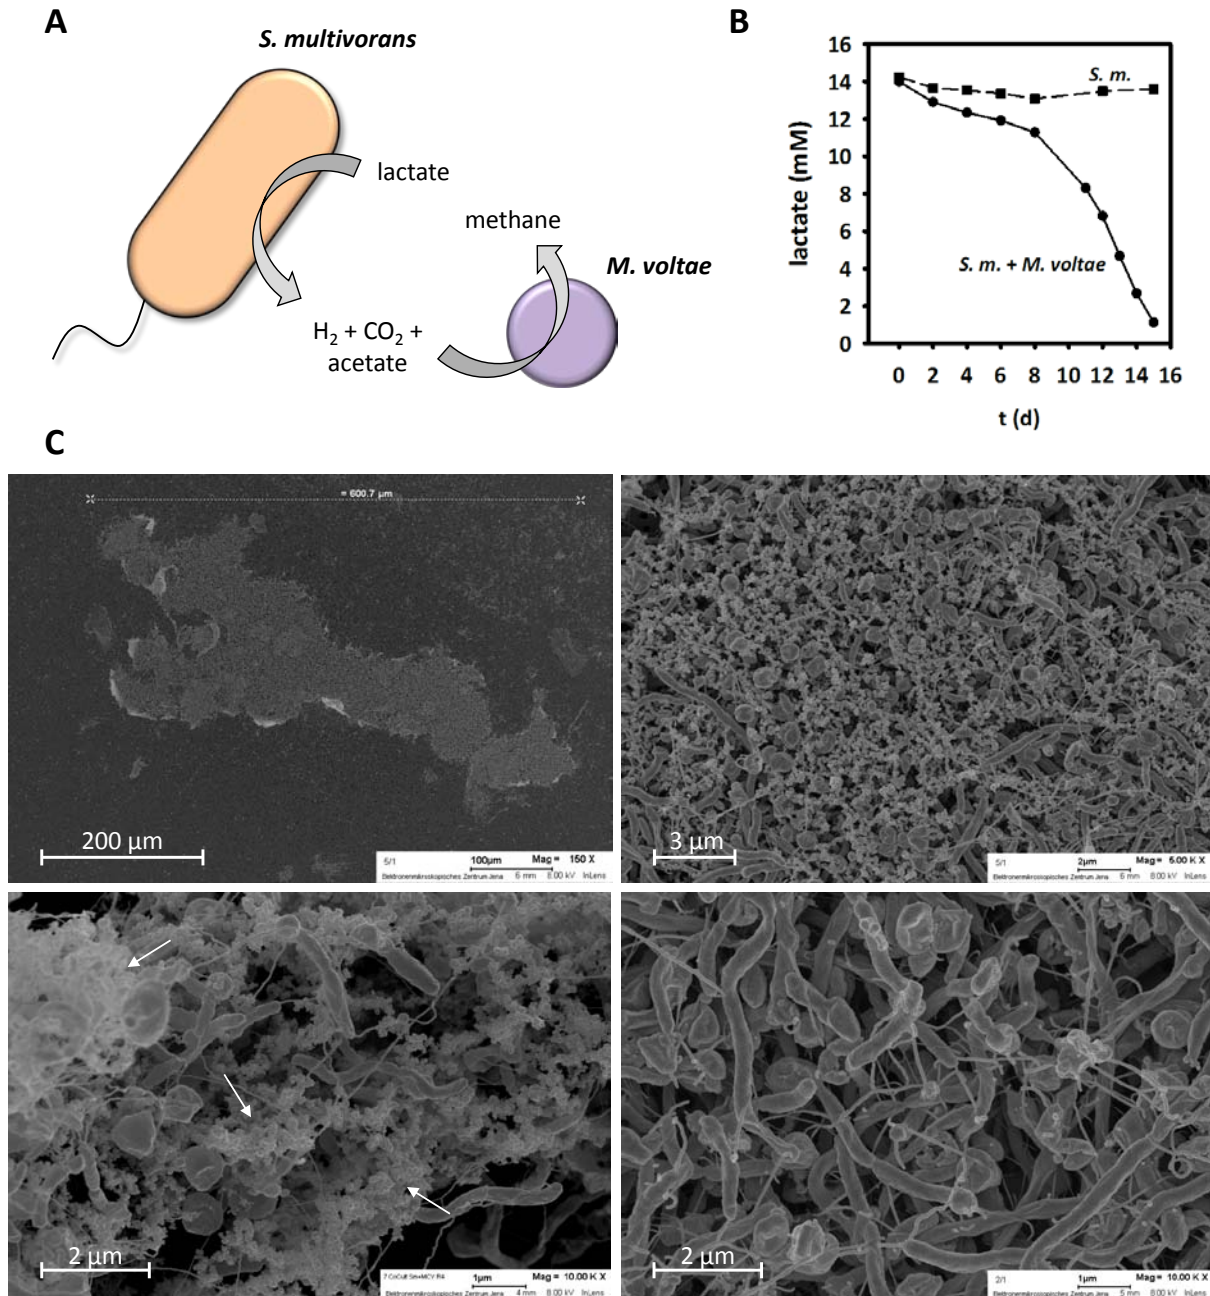

455

456 **Figure 6: Syntrophic co-culture of *S. multivorans* and *Methanococcus voltae*.** (A) scheme of syntrophic  
457 interactions and exchange of metabolites and (B) lactate concentration in *S. multivorans* pure culture and  
458 co-culture of *S. multivorans* and *M. voltae*. (C) Electron microscopic analyses and images of formed aggregates.  
459 Image sections were obtained from different areas of an aggregate. White arrows indicate EPS-like structures.  
460 Cultivation experiments included three biological replicates. S.m. - *S. multivorans*.

461

## 462 Discussion

463 In this study, production of  $H_2$  was observed for several *Sulfurospirillum* species during pyruvate  
464 fermentation, which is the first evidence of  $H_2$  production for Epsilonproteobacteria, which hitherto  
465 were generally regarded as  $H_2$  oxidizers<sup>14,35,41,42</sup>. Specifically, we report  $H_2$  production for  
466 *S. multivorans*, *S. cavolei*, *S. arsenophilum* and *S. deleyianum* during fermentative growth on

467 pyruvate. Sequential subcultivation on pyruvate alone revealed a continuous adaptation of  
468 *Sulfurospirillum* spp. to a fermentative metabolism. The mechanisms behind this long-term adaptation  
469 process in *Sulfurospirillum* spp. remain unresolved for now and might include genomic  
470 rearrangements and/or population dynamics, but also a long-term regulatory effect similar to the one  
471 observed for *S. multivorans* after continuous transfer without PCE as electron acceptor<sup>43</sup> might play a  
472 role. The basis for the latter effect is also unknown to date.

473 Two different fermentation balances were observed for the different *Sulfurospirillum* spp. tested. While  
474 *S. cavolei* showed the highest H<sub>2</sub> production rate and produced, besides hydrogen, acetate and CO<sub>2</sub>  
475 exclusively, *S. deleyianum* and *S. multivorans*, displaying lower H<sub>2</sub> production, additionally produced  
476 succinate and lactate. Pyruvate is most likely oxidized to acetate by the pyruvate:ferredoxin  
477 oxidoreductase, which showed an upregulation in the proteome of fermentatively cultivated compared  
478 to fumarate-respiring cells in both, *S. multivorans* and *S. cavolei*. The quinone-dependent pyruvate  
479 dehydrogenase (PoxB) might transfer electrons generated upon pyruvate fermentation to  
480 menaquinone, however, since PoxB is downregulated in fermenting cells, it is suggested that this  
481 enzyme does not contribute significantly, if at all, to pyruvate oxidation under this condition. A pyruvate  
482 formate lyase is not encoded in any *Sulfurospirillum* spp., which, in addition to the low protein  
483 abundance of a cytoplasmic formate dehydrogenase, argues against the role of the Hyf in a formate  
484 hydrogen lyase complex as suggested for a similar hydrogenase in *E. coli*<sup>44</sup>. The generated  
485 acetyl-CoA is used to generate acetate and one mol ATP per mol pyruvate via substrate-level  
486 phosphorylation .

487 Electrons generated upon pyruvate oxidation are most likely transferred in both organisms to a  
488 ferredoxin of the *Allochromatium vinosum*-type, which is known for the very negative redox potentials  
489 of its two [4Fe4S] clusters<sup>45</sup>. The proteome data and biochemical experiments presented in our study  
490 strongly suggest that the Hyf (hydrogenase 4) of *Sulfurospirillum* spp. accepts electrons from the  
491 reduced ferredoxin to reduce two protons to hydrogen. Hyf is significantly upregulated, whereas the  
492 other hydrogenases are either detected only in low amounts in the proteome data or are unaltered or  
493 downregulated under fermentative cultivation. Furthermore, reduced methyl viologen served as  
494 electron donor for H<sub>2</sub> production only with crude extract and not with intact cells, suggesting a  
495 cytoplasmic localization of the hydrogen-producing hydrogenase, as was suggested for the Hyf<sup>20,29</sup>.  
496 The involvement of a Hyf in H<sub>2</sub> production via pyruvate oxidation was also observed in a group 4  
497 hydrogenase from *Pyrococcus furiosus*<sup>46</sup> and for a genetically modified *E. coli* strain<sup>47</sup>. The structure

498 and subunit composition of several group 4 hydrogenases suggested their involvement in the  
499 generation of a proton motive force, thereby contributing to ATP formation<sup>48,49</sup>. A thorough alignment  
500 analysis of the subunits of *Sulfurospirillum* spp. Hyf indicated that most of the important residues in the  
501 membrane helices are conserved, thus making a role in energy conservation of this hydrogenase a  
502 possible scenario. The difference in the amount of H<sub>2</sub> produced with *S. cavolei* producing more H<sub>2</sub>  
503 than *S. multivorans* can be explained by two different fermentation metabolism types. Opposed to  
504 *S. cavolei*, reducing equivalents can be channelled into the production of lactate and succinate by  
505 *S. multivorans* (as was also observed for *S. deleyianum*) upon pyruvate fermentation. Succinate might  
506 be produced from fumarate (fumarate reductase) via malate (fumarase), which could be formed from  
507 pyruvate via reductive decarboxylation to malate by the malic enzyme. This enzyme, which often  
508 functions in the reverse direction e. g. in C<sub>4</sub> plants, is upregulated in *S. multivorans* under fermentative  
509 conditions. This finding supports the involvement of the malic enzyme in conversion of pyruvate to  
510 malate. The malic enzyme was not detected in the proteomes of *S. cavolei*, which might at least  
511 partially explain the different fermentation balances.

512 The origin of lactate in *S. multivorans* is not clear. An NAD<sup>+</sup>-dependent lactate dehydrogenase was  
513 not detected in any of the proteomes and no NAD(P)<sup>+</sup>-dependent lactate production could be  
514 measured. Most likely, the lactate dehydrogenase is misannotated in the genome of *S. multivorans*, as  
515 reported for a related protein of *Campylobacter jejuni*<sup>50</sup>. A possible source of lactate could be the  
516 reduction of pyruvate via an unknown, NAD<sup>+</sup>-independent lactate dehydrogenase (iLDH). Some of  
517 these are characterized to be functional in the direction of lactate oxidation<sup>51,52</sup> and could act in the  
518 reverse direction to produce lactate in *Sulfurospirillum* spp., possibly with reduced ferredoxin as  
519 electron donor. Several candidates of iLDHs are encoded in the genome of *S. multivorans*, but only  
520 one of them shows a slight upregulation on pyruvate alone. A homolog of the corresponding gene  
521 cluster is not encoded in the lactate-producing *S. deleyianum*, making it an unlikely candidate for  
522 lactate production. A glycolate oxidase was shown to be responsible for lactate oxidation in  
523 *Pseudomonas putida*<sup>39,53</sup> and a homolog is encoded in both lactate-producing *Sulfurospirillum* spp.  
524 This protein, however, is not upregulated upon pyruvate fermentation and further studies are needed  
525 to identify the lactate-producing enzyme in *S. multivorans*.

526 The different disposal of excess reducing equivalents during fermentation enables *S. multivorans* to  
527 grow with pyruvate even with 100% H<sub>2</sub> in the gas phase, whereas the growth of *S. cavolei* was nearly  
528 completely abolished under these conditions. This correlates with a shift towards a higher production



529 of lactate and succinate and a lower acetate and H<sub>2</sub> production of *S. multivorans* under these  
530 conditions . The inability of *Sulfurospirillum* spp. to use lactate as sole substrate in pure cultures is  
531 most probably due to the thermodynamically unfavorable lactate oxidation to pyruvate upon hydrogen  
532 production. However, a syntrophic partnership of *S. multivorans* with a hydrogen-consumer,  
533 *Methanococcus voltae*, enabled lactate utilization by *S. multivorans* and led to the formation of large  
534 cell aggregates of the two organisms presumably via the formation of EPS.

535 These findings confirm our suggested role of *Sulfurospirillum* spp. as H<sub>2</sub> producers in anaerobic food  
536 webs. Additionally, this role as a potential H<sub>2</sub> producer is most likely not limited to this genus. In a  
537 genome mining approach, *hyf* gene clusters were found among several genera of  
538 Epsilonproteobacteria inhabiting a wide range of habitats. Some *Campylobacter* spp. known to be  
539 opportunistic or food-born pathogens encode the same *Hyf* as *Sulfurospirillum* spp., while *hyf* gene  
540 clusters containing either a formate channel gene in different *Campylobacter* spp. or additionally a  
541 cytoplasmic formate dehydrogenase in other phyla might indicate the formation of a formate hydrogen  
542 lyase complex. Since a PFL is missing in these bacteria, it might be presumed that extracellular  
543 formate might aid growth in these bacteria as reported for *Thermococcus* spp.<sup>54</sup>. Some  
544 *Sulfurospirillum* spp. even encode for both, a FHL-independent *Hyf* and one presumably forming an  
545 FHL complex, pointing towards separate regulation and roles of both hydrogenases and thus for even  
546 more physiological diversity in this genus.  
547

548

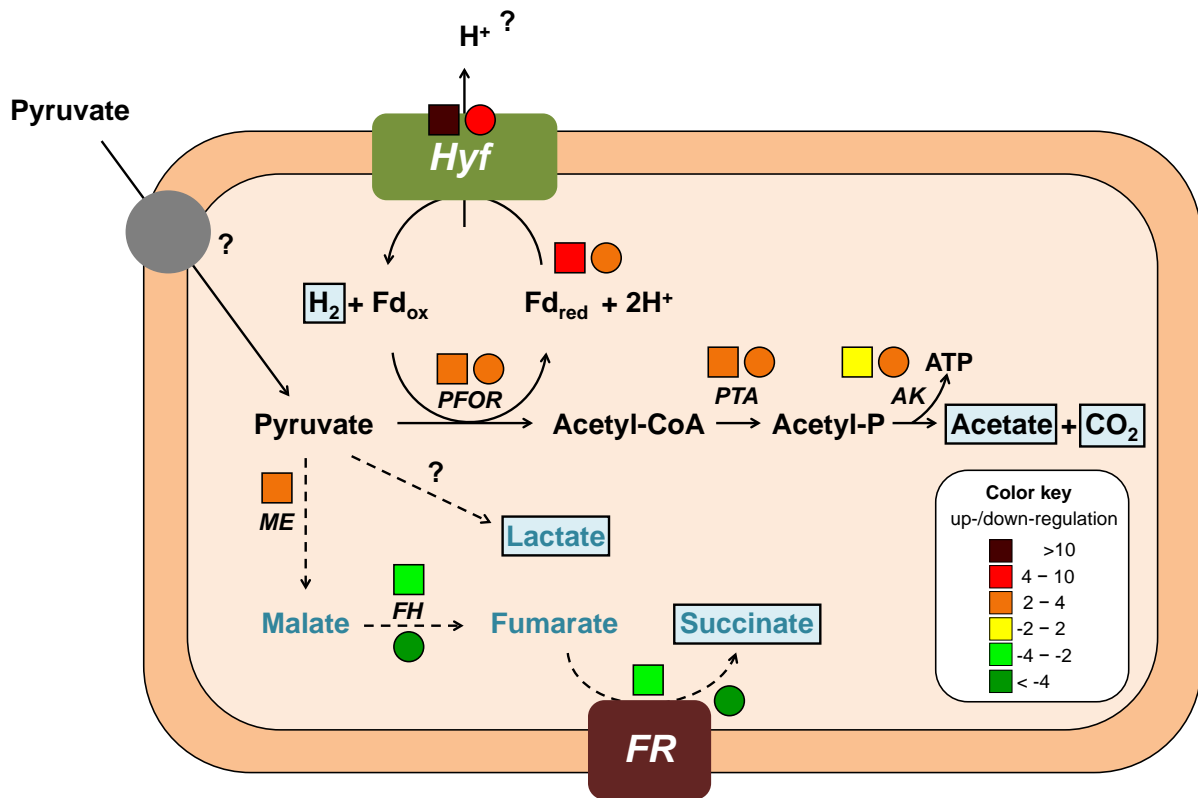

549

550 **Figure 7: Tentative scheme of pyruvate fermentation metabolism in *S. multivorans* and *S. cavolei*.**  
 551 Reactions represented by solid arrows belong to the core pyruvate metabolism and are catalyzed by both  
 552 organisms. Reactions with dashed arrows are solely catalyzed by *S. multivorans*, fumarate hydratase and  
 553 fumarate reductase are also present in *S. cavolei*. Fermentation products are highlighted in light blue boxes.  
 554 Protein abundance ratios (pyruvate alone versus pyruvate/fumarate) are indicated by colored squares  
 555 (*S. multivorans*) and circles (*S. cavolei*) at the protein abbreviations (. Color code of the ratios is given in the box  
 556 at the lower right. Hyf - Hyf-like hydrogenase (SMUL\_2383-2392; SCA02S\_RS01920-RS01965), PFOR -  
 557 pyruvate:ferredoxin oxidoreductase (SMUL\_2630; SCA02S\_RS04525), PTA - phosphotransacetylase  
 558 (SMUL\_1483; SCA02S\_RS00245), AK - acetate kinase (SMUL\_1484; SCA02S\_RS00240), ME - malic enzyme  
 559 (SMUL\_3158; corresponding enzyme in *S. cavolei* is not present), FH - fumarate hydratase (SMUL\_1459;  
 560 SMUL\_1679-1680; SCA02S\_RS00615-RS00620), FR - fumarate reductase (SMUL\_0550-0552;  
 561 SCA02S\_RS07735-RS07740).

562

## 563 Conclusion

564 Taken together, our results show that several Epsilonproteobacteria have to be considered as H<sub>2</sub>  
 565 producers and serve as syntrophic partners under certain conditions. H<sub>2</sub> production in *Sulfurospirillum*  
 566 spp. under the tested conditions relies on Hyf, a multisubunit, membrane-bound and cytoplasmically  
 567 oriented group 4 NiFe hydrogenase similar to the one used in a second *E. coli* formate hydrogen lyase  
 568 complex and probably functioning as a proton pump. Adaptation to fermentative conditions seems to  
 569 be common in *S. multivorans* and related strains, although the underlying mechanism of this process  
 570 is still unclear. Two separate clades of *Sulfurospirillum* spp. have different fermentation pathways, the  
 571 *S. cavolei* clade producing more H<sub>2</sub> and exclusively one organic acid, namely acetate, in comparison

572 to *S. multivorans*, which additionally produces lactate and succinate. All these findings imply an even  
573 higher versatility for Epsilonproteobacteria than previously thought and a new ecological role for  
574 *Sulfurospirillum* spp., which inhabit a large range of environmentally or biotechnologically important  
575 habitats such as wastewater plants, oil reservoirs, bioelectrodes, contaminated sediments or marine  
576 areas.

577

## 578 **Acknowledgement**

579 This work was funded by the German Research Council (DFG) - Jena School for Microbial  
580 Communication (JSMC) and Research Unit FOR1530. We would like to gratefully acknowledge  
581 Susanne Linde (University Hospital Jena, Center for Electron Microscopy) for the field-emission  
582 scanning electron microscopic analysis. The presented work included the use of analytical facilities of  
583 the Centre for Chemical Microscopy (ProVIS) at the Helmholtz Centre for Environmental Research  
584 (UFZ Leipzig). ProVIS is funded by the European Regional Development Funds (EFRE - Europe funds  
585 Saxony) and the Helmholtz Association. The authors would like to thank Benjamin Scheer (UFZ  
586 Leipzig) for invaluable assistance in the lab with mass spectrometry and Dominique Türkowsky (UFZ  
587 Leipzig) for help with statistical analysis of proteome data.

588

## 589 **Author Contributions**

590 SK performed the wetlab work, SK and TG planned experiments, TG initiated the study, TG and GD  
591 supervised the study, LA performed mass-spectrometric analysis, SK, TG and GD analyzed and  
592 discussed data, MW was responsible for electron microscopy, SK and TG drafted the manuscript, all  
593 authors revised, read and approved this manuscript.

## 594 **References**

595

- 596 1. McInerney, M. et al. Physiology, ecology, phylogeny, and genomics of microorganisms  
597 capable of syntrophic metabolism. *Ann N Y Acad Sci.* **1125**, 58-72 (2008).
- 598 2. McInerney, M.J., Sieber, J.R. & Gunsalus, R.P. Syntrophy in anaerobic global carbon cycles.  
599 *Curr Opin Biotechnol* **20**, 623-632 (2009).
- 600 3. McInerney, M., Bryant, M., Hespell, R. & Costerton, J. *Syntrophomonas wolfei* gen. nov. sp.  
601 nov., an anaerobic, syntrophic, fatty acid-oxidizing bacterium. *Appl and Environ Microbiol* **41**,  
602 1029-1039 (1981).



- 603 4. Schink, B. & Stams, A. Prokaryotic Communities and Ecophysiology. The Prokaryotes (eds. E.  
604 Rosenberg, E. DeLong, S. Lory, E. Stackebrandt & F. Thompson) 471-493 (Springer, Berlin  
605 Heidelberg; 2013).
- 606 5. Stams, A.J. & Plugge, C.M. Electron transfer in syntrophic communities of anaerobic bacteria  
607 and archaea. *Nat Rev Microbiol* **7**, 568-577 (2009).
- 608 6. Morris, B.E., Henneberger, R., Huber, H. & Moissl-Eichinger, C. Microbial syntrophy:  
609 Interaction for the common good. *FEMS Microbiol Rev* **37**, 384-406 (2013).
- 610 7. Stams, A.J. Metabolic interactions between anaerobic bacteria in methanogenic  
611 environments. *Antonie Van Leeuwenhoek* **66**, 271-294 (1994).
- 612 8. de Bok, F.A., Plugge, C.M. & Stams, A.J. Interspecies electron transfer in methanogenic  
613 propionate degrading consortia. *Water Res* **38**, 1368-1375 (2004).
- 614 9. Ishii, S., Kosaka, T., Hori, K., Hotta, Y. & Watanabe, K. Coaggregation facilitates interspecies  
615 hydrogen transfer between *Pelotomaculum thermopropionicum* and *Methanothermobacter*  
616 *thermautotrophicus*. *Appl Environ Microbiol* **71**, 7838-7845 (2005).
- 617 10. Summers, Z.M. et al. Direct exchange of electrons within aggregates of an evolved syntrophic  
618 coculture of anaerobic bacteria. *Science* **330**, 1413-1415 (2010).
- 619 11. Lee, H.S., Vermaas, W.F. & Rittmann, B.E. Biological hydrogen production: prospects and  
620 challenges. *Trends Biotechnol* **28**, 262-271 (2010).
- 621 12. Dross, F. et al. The quinone-reactive Ni/Fe-hydrogenase of *Wolinella succinogenes*. *Eur J*  
622 *Biochem* **206**, 93-102 (1992).
- 623 13. Maier, R.J. et al. Hydrogen uptake hydrogenase in *Helicobacter pylori*. *FEMS Microbiol Lett*  
624 **141**, 71-76 (1996).
- 625 14. Meyer, J.L. & Huber, J.A. Strain-level genomic variation in natural populations of *Lebetimonas*  
626 from an erupting deep-sea volcano. *ISME J* **8**, 867-880 (2014).
- 627 15. Handley, K.M. et al. The complete genome sequence for putative H<sub>2</sub>- and S-oxidizer  
628 *Candidatus Sulfuricurvum* sp., assembled de novo from an aquifer-derived metagenome.  
629 *Environ Microbiol* **16**, 3443-3462 (2014).
- 630 16. Nakagawa, S. et al. Deep-sea vent epsilon-proteobacterial genomes provide insights into  
631 emergence of pathogens. *Proc Natl Acad Sci U S A* **104**, 12146-12150 (2007).
- 632 17. Roalkvam, I. et al. Physiological and genomic characterization of *Arcobacter anaerophilus* IR-  
633 1 reveals new metabolic features in Epsilonproteobacteria. *Front Microbiol* **6**, 987 (2015).
- 634 18. Campbell, B.J. et al. Adaptations to submarine hydrothermal environments exemplified by  
635 the genome of *Nautilia profundicola*. *PLoS Genet* **5**, e1000362 (2009).
- 636 19. Ross, D.E., Marshall, C.W., May, H.D. & Norman, R.S. Comparative Genomic Analysis of  
637 *Sulfurospirillum cavolei* MES Reconstructed from the Metagenome of an Electrosynthetic  
638 Microbiome. *PLoS One* **11**, e0151214 (2016).
- 639 20. Goris, T. et al. Insights into organohalide respiration and the versatile catabolism of  
640 *Sulfurospirillum multivorans* gained from comparative genomics and physiological studies.  
641 *Environ Microbiol* **16**, 3562-3580 (2014).
- 642 21. Zhang, Y. & Sievert, S.M. Pan-genome analyses identify lineage- and niche-specific markers of  
643 evolution and adaptation in Epsilonproteobacteria. *Front Microbiol* **5**, 110 (2014).
- 644 22. Han, Y. & Perner, M. The globally widespread genus *Sulfurimonas*: versatile energy  
645 metabolisms and adaptations to redox clines. *Front Microbiol* **6**, 989 (2015).
- 646 23. Goris, T. & Diekert, G. The Genus *Sulfurospirillum*. Organohalide-respiring Bacteria. (eds. L.  
647 Adrian & F. Löffler) (Springer, Berlin Heidelberg; 2016).
- 648 24. Luijten, M. et al. Anaerobic reduction and oxidation of quinone moieties and the reduction of  
649 oxidized metals by halo-respiring and related organisms. *FEMS Microbiol Ecol* **49**, 145-150  
650 (2004).
- 651 25. Neumann, A., Scholz-Muramatsu, H. & Diekert, G. Tetrachloroethene metabolism of  
652 *Dehalospirillum multivorans*. *Arch Microbiol* **162**, 295-301 (1994).
- 653 26. Goris, T. et al. Proteomics of the organohalide-respiring Epsilonproteobacterium  
654 *Sulfurospirillum multivorans* adapted to tetrachloroethene and other energy substrates. *Sci*  
655 *Rep* **5**, 13794 (2015).

- 656 27. Page, A. et al. Microbial diversity associated with a *Paralvinella sulfincola* tube and the  
657 adjacent substratum on an active deep-sea vent chimney. *Geobiology* **2**, 225-238 (2004).
- 658 28. Jensen, A. & Finster, K. Isolation and characterization of *Sulfurospirillum carboxydovorans* sp  
659 nov., a new microaerophilic carbon monoxide oxidizing epsilon Proteobacterium. *Antonie*  
660 *Van Leeuwenhoek International Journal of General and Molecular Microbiology* **87**, 339-353  
661 (2005).
- 662 29. Kruse, S., Goris, T., Wolf, M., Wei, X. & Diekert, G. The NiFe Hydrogenases of the  
663 Tetrachloroethene-Respiring Epsilonproteobacterium *Sulfurospirillum multivorans*:  
664 Biochemical Studies and Transcription Analysis. *Front Microbiol* **8**, 444 (2017).
- 665 30. Scholz-Muramatsu, H., Neumann, A., Messmer, M., Moore, E. & Diekert, G. Isolation and  
666 characterization of *Dehalospirillum multivorans* gen. nov., sp. nov., a tetrachloroethene-  
667 utilizing, strictly anaerobic bacterium. *Arch Microbiol* **163**, 48-56 (1995).
- 668 31. Neumann, A. et al. Phenyl methyl ethers: novel electron donors for respiratory growth of  
669 *Desulfitobacterium hafniense* and *Desulfitobacterium* sp strain PCE-S. *Arch Microbiol* **181**,  
670 245-249 (2004).
- 671 32. Whitman, W.B., Ankwarda, E. & Wolfe, R.S. Nutrition and carbon metabolism of  
672 *Methanococcus voltae*. *J Bacteriol* **149**, 852-863 (1982).
- 673 33. Bradford, M.M. A rapid and sensitive method for the quantitation of microgram quantities of  
674 protein utilizing the principle of protein-dye binding. *Anal Biochem* **72**, 248-254 (1976).
- 675 34. Kublik, A. et al. Identification of a multi-protein reductive dehalogenase complex in  
676 *Dehalococcoides mccartyi* strain CBDB1 suggests a protein-dependent respiratory electron  
677 transport chain obviating quinone involvement. *Environ Microbiol* **18**, 3044-3056 (2016).
- 678 35. Kodama, Y., Ha, L. & Watanabe, K. *Sulfurospirillum cavolei* sp nov, a facultatively anaerobic  
679 sulfur-reducing bacterium isolated from an underground crude oil storage cavity.  
680 *International Journal of Systematic and Evolutionary Microbiology* **57**, 827-831 (2007).
- 681 36. Aziz, R.K. et al. The RAST Server: rapid annotations using subsystems technology. *BMC*  
682 *Genomics* **9**, 75 (2008).
- 683 37. Goris, T. et al. The complete genome of the tetrachloroethene-respiring  
684 Epsilonproteobacterium *Sulfurospirillum halorespirans*. *J Biotechnol* **255**, 33-36 (2017).
- 685 38. Evans, J.D. & Martin, S.A. Cloning of the L-lactate dehydrogenase gene from the ruminal  
686 bacterium *Selenomonas ruminantium* HD4. *Curr Microbiol* **44**, 155-160 (2002).
- 687 39. Jiang, T. et al. A Bacterial Multidomain NAD-Independent d-Lactate Dehydrogenase Utilizes  
688 Flavin Adenine Dinucleotide and Fe-S Clusters as Cofactors and Quinone as an Electron  
689 Acceptor for d-Lactate Oxidization. *J Bacteriol* **199** (2017).
- 690 40. Fuller, J.R. et al. Identification of a lactate-quinone oxidoreductase in *Staphylococcus aureus*  
691 that is essential for virulence. *Front Cell Infect Microbiol* **1**, 19 (2011).
- 692 41. Campbell, B.J., Engel, A.S., Porter, M.L. & Takai, K. The versatile epsilon-proteobacteria: key  
693 players in sulphidic habitats. *Nat Rev Microbiol* **4**, 458-468 (2006).
- 694 42. Miroshnichenko, M. et al. *Caminibacter profundus* sp nov., a novel thermophile of Nautiliales  
695 ord. nov within the class 'Epsilonproteobacteria', isolated from a deep-sea hydrothermal  
696 vent. *International Journal of Systematic and Evolutionary Microbiology* **54**, 41-45 (2004).
- 697 43. John, M. et al. Retentive memory of bacteria: Long-term regulation of dehalorespiration in  
698 *Sulfurospirillum multivorans*. *J Bacteriol* **191**, 1650-1655 (2009).
- 699 44. Mirzoyan, S., Romero-Pareja, P., Coello, M., Trchounian, A. & Trchounian, K. Evidence for  
700 hydrogenase-4 catalyzed biohydrogen production in *Escherichia coli*. *International Journal of*  
701 *Hydrogen Energy* **42**, 21697-21703 (2017).
- 702 45. Kyritsis, P., Hatzfeld, O.M., Link, T.A. & Moulis, J.M. The two [4Fe-4S] clusters in *Chromatium*  
703 *vinosum* ferredoxin have largely different reduction potentials. Structural origin and  
704 functional consequences. *J Biol Chem* **273**, 15404-15411 (1998).
- 705 46. McTernan, P.M. et al. Engineering the respiratory membrane-bound hydrogenase of the  
706 hyperthermophilic archaeon *Pyrococcus furiosus* and characterization of the catalytically  
707 active cytoplasmic subcomplex. *Protein Eng Des Sel* **28**, 1-8 (2015).

- 708 47. Lamont, C.M. et al. Expanding the substrates for a bacterial hydrogenlyase reaction.  
709 *Microbiology* **163**, 649-653 (2017).
- 710 48. Hedderich, R. Energy-converting [NiFe] hydrogenases from archaea and extremophiles:  
711 Ancestors of complex I. *J Bioenerg Biomembr* **36**, 65-75 (2004).
- 712 49. Marreiros, B.C., Batista, A.P., Duarte, A.M. & Pereira, M.M. A missing link between complex I  
713 and group 4 membrane-bound [NiFe] hydrogenases. *Biochim Biophys Acta* **1827**, 198-209  
714 (2013).
- 715 50. Thomas, M.T. et al. Two respiratory enzyme systems in *Campylobacter jejuni* NCTC 11168  
716 contribute to growth on L-lactate. *Environ Microbiol* **13**, 48-61 (2011).
- 717 51. Pinchuk, G.E. et al. Genomic reconstruction of *Shewanella oneidensis* MR-1 metabolism  
718 reveals a previously uncharacterized machinery for lactate utilization. *Proc Natl Acad Sci U S*  
719 *A* **106**, 2874-2879 (2009).
- 720 52. Chai, Y., Kolter, R. & Losick, R. A widely conserved gene cluster required for lactate utilization  
721 in *Bacillus subtilis* and its involvement in biofilm formation. *J Bacteriol* **191**, 2423-2430  
722 (2009).
- 723 53. Zhang, Y. et al. Coexistence of two d-lactate-utilizing systems in *Pseudomonas putida* KT2440.  
724 *Environ Microbiol Rep* **8**, 699-207(2016).
- 725 54. Kim, Y.J. et al. Formate-driven growth coupled with H<sub>2</sub> production. *Nature* **467**, 352-355  
726 (2010).
- 727
